# Supplementary material for: The β-alanine transporter BalaT is required for visual neurotransmission in Drosophila
Source: eLife. 2017 Aug 14;6:e29146. doi: 10.7554/eLife.29146 (PMC5555718; doi:10.7554/eLife.29146)
Supplement: Figure 1—source data 1. — [3H]-β-alanine uptake data for screening for β-alanine transporter in HEK 293 T cells and S2 cells (.xlsx file). DOI: http://dx.doi.org/10.7554/eLife.29146.004 [file elife-29146-fig1-data1.xlsx]

## Sheet: Figure 1A source data
Figure 1-source data 1
Title: source data for screening for β-alanine transporter
β-alanine screen in HEK293T
	protein levels (mg)	CPM	CPM/mg	Bq/mg
MOCK	0.178926	573	3202.44	53.3739
	0.176737	585	3310.01	55.1669
	0.129914	456	3510.01	58.5002
RFP	0.187306	617	3294.07	54.9012
	0.180203	613	3401.73	56.6955
	0.186226	559	3001.73	50.0288
CG3790	0.169221	1201	7097.24	118.287
	0.136426	1026	7520.54	125.342
	0.129902	886	6820.54	113.676
CG18660	0.120004	541	4508.19	75.1365
	0.162643	655	4027.23	67.1204
	0.144886	569	3927.23	65.4538
CG2893	0.117303	507	4322.12	72.0354
	0.120161	569	4735.32	78.9221
	0.132786	496	3735.32	62.2554
CG7342	0.0991888	376	3790.75	63.1791
	0.0971317	348	3582.76	59.7127
	0.0879382	403	4582.77	76.3794
CG13610	0.098446	397	4032.67	67.2111
	0.0994746	378	3799.97	63.3328
	0.0902447	370	4099.97	68.3328
CG6331	0.111475	425	3812.52	63.542
	0.108332	378	3489.28	58.1546
	0.0821959	369	4489.28	74.8213
CG6126	0.0550119	204	3708.29	61.8048
	0.0583776	224	3837.09	63.9515
	0.0823679	349	4237.09	70.6181
CG4360	0.102046	328	3214.24	53.5706
	0.103418	330	3190.95	53.1825
	0.106833	405	3790.95	63.1825
CG3159	0.136104	469	3445.9	57.4316
	0.13719	465	3389.47	56.4912
	0.114926	447	3889.47	64.8245
CG6723	0.0969196	389	4013.64	66.8939
	0.0986873	395	4002.54	66.709
	0.11714	422	3602.54	60.0424
CG11010	0.102846	389	3782.35	63.0392
	0.102275	396	3871.93	64.5321
	0.092179	403	4371.93	72.8655
CG13743	0.097246	415	4267.53	71.1255
	0.0971888	424	4362.64	72.7107
	0.104182	392	3762.64	62.7107
CG10804	0.180605	729	4036.43	67.2738
	0.156678	695	4435.84	73.9306
	0.17884	686	3835.84	63.9306
CG4545	0.099446	431	4334.01	72.2335
	0.1187	487	4102.79	68.3798
	0.109647	406	3702.79	61.7131
CG5281	0.0951888	411	4317.74	71.9623
	0.0967888	392	4050.05	67.5009
	0.108265	406	3750.05	62.5009
CG43066	0.162628	655	4027.59	67.1265
	0.165403	709	4286.51	71.4418
	0.184728	681	3686.51	61.4418
CG7442	0.176832	721	4077.32	67.9553
	0.145282	693	4770.02	79.5003
	0.150928	569	3770.02	62.8337
CG7708	0.101417	409	4032.84	67.2139
	0.101532	447	4402.56	73.3761
	0.118249	426	3602.56	60.0427
CG13248	0.132618	533	4019.06	66.9843
	0.134161	523	3898.3	64.9717
	0.147721	502	3398.3	56.6384
CG42322	0.121992	497	4074.05	67.9008
	0.107018	499	4662.78	77.7131
	0.143161	553	3862.79	64.3798

## Sheet: Figure 1B source data
CG3790 transported β-alanine into S2 cells
	protein levels (mg)	CPM	CPM/mg	Bq/mg
MOCK	0.103301	378	3659.22	60.987
	0.105894	357	3371.3	56.1883
	0.109689	459	4184.55	69.7424
RFP	0.127995	496	3875.15	64.5858
	0.104542	367	3510.56	58.5093
	0.137084	502	3661.98	61.033
mGAT3	0.105392	1050	9962.81	166.047
	0.0938047	1048	11172.1	186.202
	0.0760456	796	10467.4	174.457
CG3790	0.115065	937	8143.19	135.72
	0.0973746	829	8513.51	141.892
	0.10612	981	9244.29	154.072
