# Supplementary material for: The β-alanine transporter BalaT is required for visual neurotransmission in Drosophila
Source: eLife. 2017 Aug 14;6:e29146. doi: 10.7554/eLife.29146 (PMC5555718; doi:10.7554/eLife.29146)
Supplement: Figure 1—source data 2. — Relative CG3790 transcript levels from wild-type (wt) bodies, wt heads, and GMR-hid heads. RNA levels were normalized to levels in wt bodies, which were set to 1 (.xlsx file). DOI: http://dx.doi.org/10.7554/eLife.29146.005 [file elife-29146-fig1-data2.xlsx]

## Sheet: Sheet1
Figure 1-source data 2
Title: source data for cg3790 mRNA levels
2-△△Ct	2-△△Ct	2-△△Ct
wt body	wt head	GMR-hid head
1	34.5653	3.81082
1	27.7577	3.3165
1	30.1707	4.62185
1	34.1642	6.12339
1	39.7889	8.4323
1	33.3472	8.0631
1	26.4783	3.8899
1	25.4999	3.60701
1	25.5078	4.77321
