# Supplementary material for: The β-alanine transporter BalaT is required for visual neurotransmission in Drosophila
Source: eLife. 2017 Aug 14;6:e29146. doi: 10.7554/eLife.29146 (PMC5555718; doi:10.7554/eLife.29146)
Supplement: Figure 2—source data 1. — Quantitative analysis of the amplitudes of ERG OFF transients about wild-type (w1118), balat1, balat2, balat1;GMR-balaT, balat1;pdh-balaT, balat2;ninaE-balaT and w+; balat1 flies. Quantitative of phototaxis behaviors of wt, balat1 balat1;GMR-balaT, balat1;pdh-balaT and balat2;ninaE-balaT flies (.xlsx file). DOI: http://dx.doi.org/10.7554/eLife.29146.013 [file elife-29146-fig2-data1.xlsx]

## Sheet: Figure2D
Figure 2-source data
Title: source data for quantitative of ERG transients
ERG
genotype	mV
w1118	6.296
	5.926
	5.093
	6.111
	6.112
balat1	0.042
	0.021
	0.158
	0.056
	0.035
balat2	0.032
	0.068
	0.164
	0.066
	0.053
balat1;pdh-balat	5.833
	5.925
	5.185
	5.832
	6.574
balat1;ninaE-balat	0.077
	0.077
	0.077
	0.034
	0.049
w+；balat1	0.21
	0.051
	0.161
	0.051
	0.183

## Sheet: Figure2E
Figure 2-source data
Title: source data for phototaxis behaviors
phototaxis
genotype	trial1	trial2	trial3	total
w1118	18	18	19	20
balat1	1	3	3	24
balat1;GMR-balat	17	17	18	18
balat1;pdh-balat	30	28	30	30
balat1;ninaE-balat	2	2	3	30
