# Supplementary material for: The β-alanine transporter BalaT is required for visual neurotransmission in Drosophila
Source: eLife. 2017 Aug 14;6:e29146. doi: 10.7554/eLife.29146 (PMC5555718; doi:10.7554/eLife.29146)
Supplement: Figure 4—source data 1. — Quantitative of fluorescence intensity ratios of β-alanine signals between retina and lobula of inx1RNAi + inx3RNAi and controls (CG2198RNAi and CG9962RNAi) (.xlsx file). DOI: http://dx.doi.org/10.7554/eLife.29146.018 [file elife-29146-fig4-data1.xlsx]

## Sheet: Figure4J
Figure 4-source data
Title: source data for β-alanine intensity
inx1RNAi+ inx3RNAi
	Area	Ind		Ind/Area		Re/Lo
Re-1	27917	1666.4		0.0596911		10.5027
Lo-1	29390	167.036		0.00568343
Re-2	356607	14535.1		0.0407595		6.17912
Lo-2	194340	1281.93		0.00659633
Re-3	298803	17756.7		0.0594262		9.8412
Lo-3	259470	1566.81		0.00603851
Re-4	16552	2160.18		0.130509		11.4357
Lo-4	23910	272.871		0.0114124
Re-5	58164	3825.66		0.0657736		9.41474
Lo-5	53202	371.682		0.00698624
Re-6	3590	341.442		0.0951092		10.2751
Lo-6	5806	53.742		0.00925629
CG9662RNAi
Re-1	16968	577.483		0.0340337		3.55772
Lo-1	20124	192.509		0.00956614
Re-2	23972	636.543		0.0265536		4.44304
Lo-2	17839	106.614		0.00597646
Re-3	22706	541.659		0.0238553		1.99218
Lo-3	12022	143.957		0.0119745
Re-4	17412	614.881		0.0353136		2.23757
Lo-4	18226	287.645		0.0157821
Re-5	25173	619.111		0.0245942		2.14576
Lo-5	14991	171.824		0.0114618
Re-6	24888	573.754		0.0230534		3.63017
Lo-6	8288	52.633		0.00635051
CG2198RNAi
Re-1	35356	2514.55		0.0711208		2.85792
Lo-1	16580	412.601		0.0248855
Re-2	22014	1262.44		0.0573472		3.05951
Lo-2	18462	346.05		0.0187439
Re-3	27658	942.762		0.0340864		4.21818
Lo-3	13039	105.366		0.00808083
Re-4	19480	511.805		0.0262734		2.94016
Lo-4	18134	162.046		0.00893603
Re-5	19977	1171.96		0.0586653		4.38438
Lo-5	23303	311.806		0.0133805
Re-6	21796	1432.98		0.0657451		3.53926
Lo-6	16107	299.203		0.018576
