# Supplementary material for: The β-alanine transporter BalaT is required for visual neurotransmission in Drosophila
Source: eLife. 2017 Aug 14;6:e29146. doi: 10.7554/eLife.29146 (PMC5555718; doi:10.7554/eLife.29146)
Supplement: Figure 5—source data 1. — Quantitative of levels of β-alanine and histamine in heads of wild-type, cart1, and balat1 flies (.xlsx file). DOI: http://dx.doi.org/10.7554/eLife.29146.022 [file elife-29146-fig5-data1.xlsx]

## Sheet: Figure 5A and 5B
Figure 5-source data
Title: source data for LC-MS
The levels of β-alanine in wt, cart1, and balat mutant fly heads
wt	cart1	balat
10.4936	4.6595	4.08627
6.62056	5.92937	2.92625
6.64394	4.78361	2.85787
5.86295	5.17438	5.69104
6.59693	4.05172	5.21648
6.10569	4.62633	6.37356
The levels of histamine in wt, cart1, and balat mutant fly heads
wt	cart1	balat
1.8428	0.369015	1.04702
1.5998	0.550455	0.886702
1.41094	0.431615	0.922056
1.90447	0.590531	1.15839
2.67035	0.305231	1.09176
1.65356	0.241438	1.51684
